# Supplementary material for: Programmed assembly of oppositely charged homogeneously decorated and Janus particles
Source: Royal Society of Chemistry journal article supplement (doi:10.1039/c6fd00008h), 2016-01-01
Supplement: c6fd00008h1.pdf [file c6fd00008h1.pdf]

## SUPPORTING INFORMATION

# Programmed Assembly of Oppositely Charged Homogeneously Decorated and Janus Particles

*Alina Kirillova, Georgi Stoychev and Alla Synytska\**

Leibniz Institute of Polymer Research Dresden, Hohe Str. 6, 01069 Dresden, Germany;  
Technische Universität Dresden, Fakultät Mathematik und Naturwissenschaften, 01062 Dresden,  
Germany

**Keywords:** Janus particles, core-shell particles, programmed assembly, raspberry-like clusters,  
half-raspberry-like clusters, dumbbell-like clusters

### Corresponding Author:

\* E-mail: [synytska@ipfdd.de](mailto:synytska@ipfdd.de) (A.S.)

Tel.: +49 (0351) 4658 327

Fax: +49 (0351) 4658 474

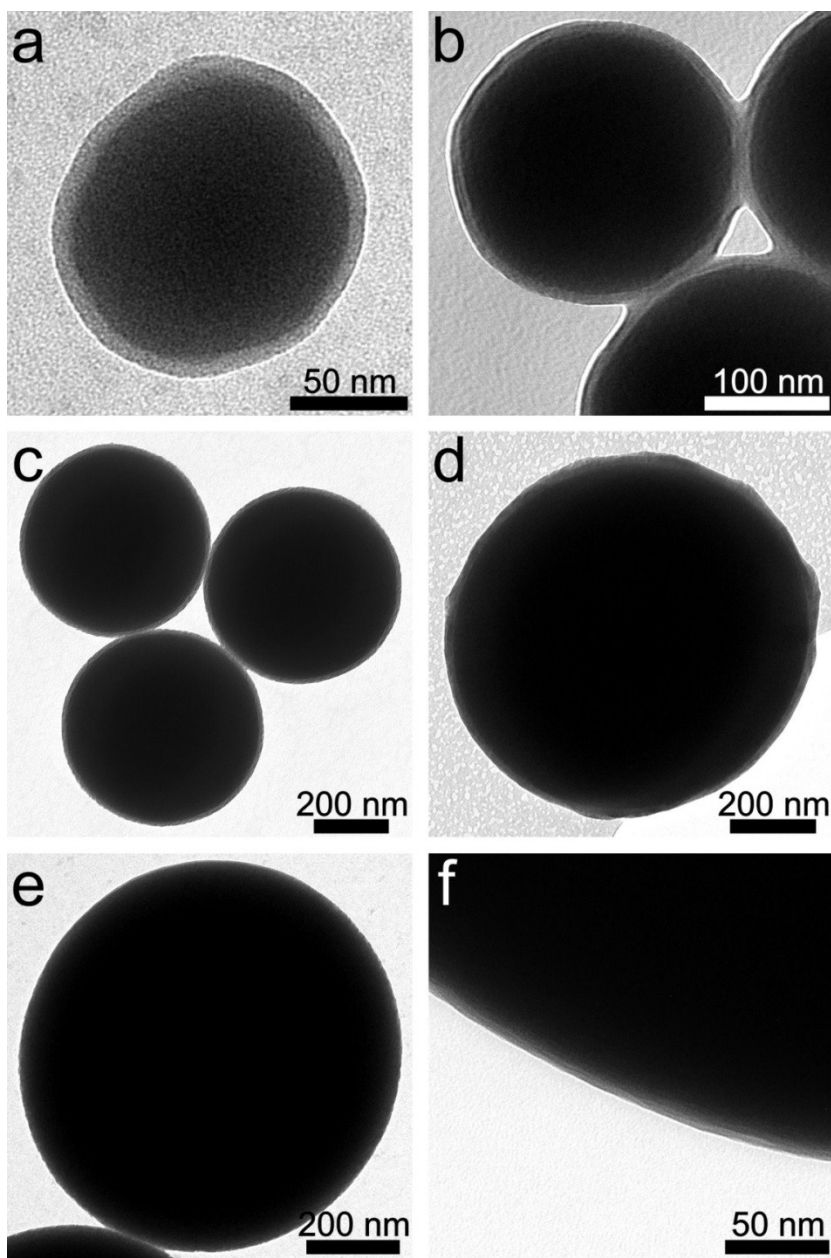

**Figure S1.** TEM images revealing the core-shell structure of the prepared homogeneously decorated as well as Janus hybrid particles: (a) PAA-100; (b) PAA-200; (c) PAA-450; (d) PDMAEMA-1 $\mu$ m; (e, f) PDMAEMA/PLMA-JP-1 $\mu$ m.

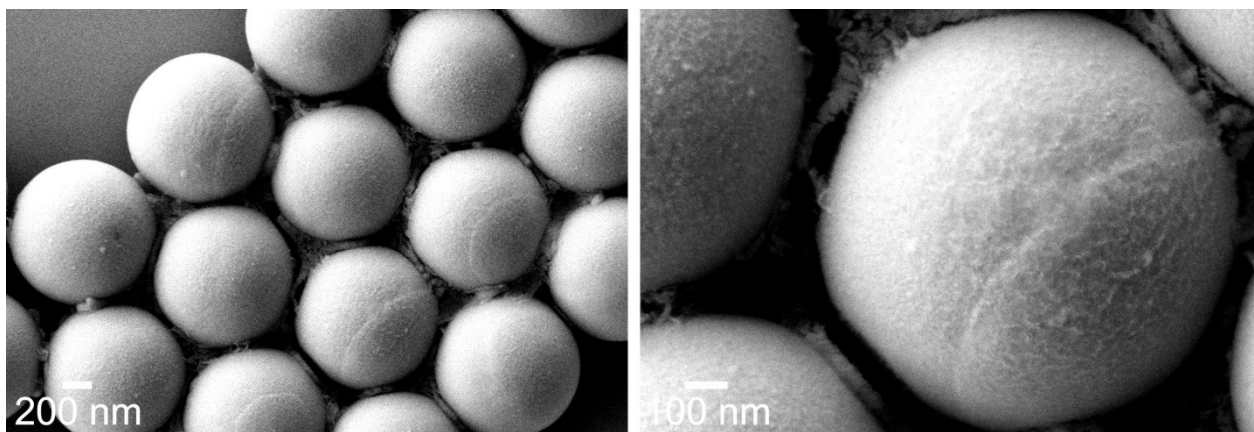

**Figure S2.** SEM images of the PDMAEMA/PLMA-JP-1 $\mu$ m Janus particles.

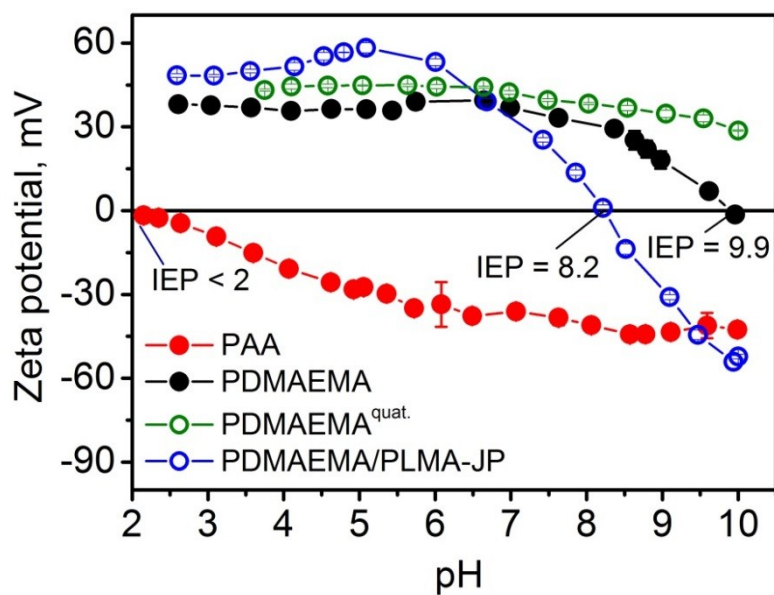

**Figure S3.** Electrophoretic measurements of silica particles covered with polymer shells: silica particles homogeneously decorated with PAA (red circles); silica particles homogeneously decorated with PDMAEMA (black circles); silica particles homogeneously decorated with quaternized PDMAEMA (green circles); PDMAEMA/PLMA Janus particles (blue circles).

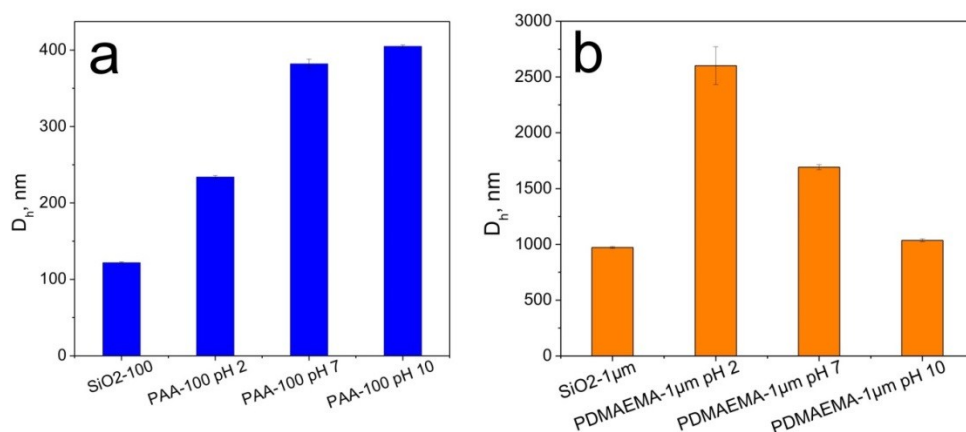

**Figure S4.** Hydrodynamic diameter ( $D_h$ ) of the corresponding undecorated SiO<sub>2</sub> core particles, and (a) PAA-100, as well as (b) PDMAEMA-1 $\mu$ m homogeneously decorated core-shell particles depending on the pH value of the dispersion measured by DLS.

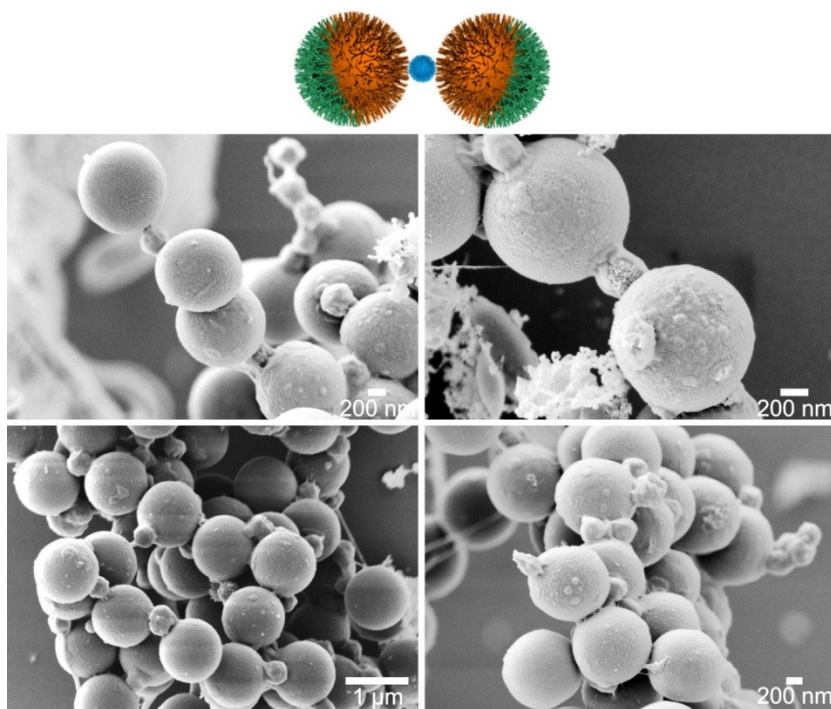

**Figure S5.** Representative cryo-SEM images of the structures formed in solution during the self-assembly of PAA-450 homogeneously decorated and PDMAEMA/PLMA-JP-1 $\mu$ m Janus particles (1:5).

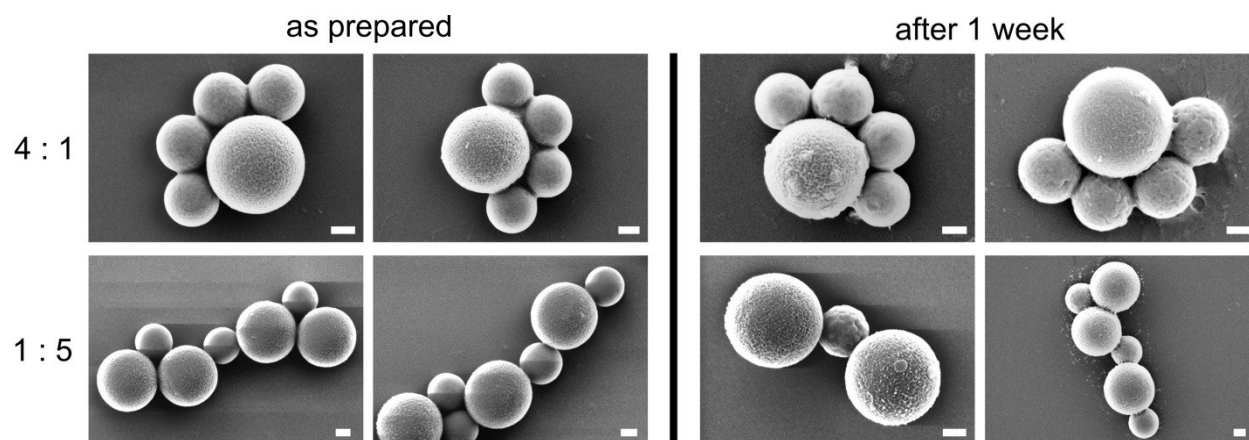

**Figure S6.** Representative SEM images of the micro-clusters assembled from PAA-450 and PDMAEMA/PLMA-JP-1 $\mu$ m directly after dispersion preparation (left), and after imaging the same dispersion in 1 week and additional sonication (right). Upper row: half-raspberry-like micro-clusters (PAA:JP = 4:1); lower row: dumbbell-like micro-clusters (PAA:JP = 1:5). Scale bars: 200 nm.
